# Supplementary material
Source: ML conference proceedings conference paper supplement (https://proceedings.neurips.cc/paper_files/paper/2016/hash/6449f44a102fde848669bdd9eb6b76fa-Abstract.html)
Supplement: Supplementary file [file 6449f44a102fde848669bdd9eb6b76fa-Supplemental.zip]

## A Proof of Proposition 3.1

*Proof.* Let  $x := \text{vec}(X) \in \mathbb{R}^{n_1 n_2}$  and  $\tilde{\mathcal{L}}(x) := \mathcal{L}(X)$ . Since the objective function is continuous in  $X$  and the set  $\mathbb{C}(r)$  is compact,  $\mathcal{L}(X)$  achieves a minimizer at some point  $\hat{X}^d \in \mathbb{C}(r)$ .

Since  $\hat{X}^d$  is a minimizer of the constrained problem, then for all matrices  $X \in \mathbb{C}(r)$  we have the following inequality

$$\tilde{\mathcal{L}}(\hat{x}^d) - \tilde{\mathcal{L}}(x) \leq 0. \quad (14)$$

By the second-order Taylor's theorem, we expand  $\tilde{\mathcal{L}}(x)$  around  $x^d = \text{vec}(X^d)$

$$\tilde{\mathcal{L}}(x) = \tilde{\mathcal{L}}(x^d) + \left\langle \nabla \tilde{\mathcal{L}}(x^d), x - x^d \right\rangle + \frac{1}{2} \left\langle \nabla^2 \tilde{\mathcal{L}}(\bar{x})(x - x^d), x - x^d \right\rangle, \quad (15)$$

where  $\bar{x} = \alpha x^d + (1 - \alpha)x$  for some  $\alpha \in [0, 1]$ . Plugging (15) with  $x = \hat{x}^d$  into (14) we obtain

$$\left\langle \nabla \tilde{\mathcal{L}}(x^d), \hat{x}^d - x^d \right\rangle + \frac{1}{2} \left\langle \nabla^2 \tilde{\mathcal{L}}(\bar{x})(\hat{x}^d - x^d), \hat{x}^d - x^d \right\rangle \leq 0. \quad (16)$$

Through some algebraic manipulation we have the following expression for the gradient of  $\tilde{\mathcal{L}}(x)$ :

$$\nabla \tilde{\mathcal{L}}(x) = \text{vec} \left( \sum_{t=1}^d w_t \mathcal{A}^{t*} [\mathcal{A}^t(X) - y^t] \right). \quad (17)$$

Based on the above gradient it follows that

$$\nabla^2 \tilde{\mathcal{L}}(x)b = \text{vec} \left( \sum_{t=1}^d w_t \mathcal{A}^{t*} [\mathcal{A}^t(B)] \right), \quad (18)$$

where  $b = \text{vec}(B)$ .

Now based on (17) and (18), the absolute value of first term in (16) can be bounded as

$$\begin{aligned} \left| \left\langle \nabla \tilde{\mathcal{L}}(x^d), \hat{x}^d - x^d \right\rangle \right| &= \left| \left\langle \sum_{t=1}^d w_t \mathcal{A}^{t*} [\mathcal{A}^t(X^d) - y^t], \Delta^d \right\rangle \right| \\ &\leq \left\| \sum_{t=1}^d w_t \mathcal{A}^{t*} [\mathcal{A}^t(X^d) - y^t] \right\|_2 \|\Delta^d\|_* \\ &\leq \left\| \sum_{t=1}^d w_t \mathcal{A}^{t*} (h^t - z^t) \right\|_2 \sqrt{2r} \|\Delta^d\|_F \end{aligned} \quad (19)$$

The first inequality above used the trace dual norm inequality, while the second inequality follows from a basic inequality for rank- $2r$  matrices. Similarly the second term in (16) is

$$\begin{aligned} \frac{1}{2} \left\langle \nabla^2 \tilde{\mathcal{L}}(\bar{x})(\hat{x}^d - x^d), \hat{x}^d - x^d \right\rangle &= \frac{1}{2} \left\langle \sum_{t=1}^d w_t \mathcal{A}^{t*} \mathcal{A}^t(\Delta^d), \Delta^d \right\rangle \\ &= \frac{1}{2} \sum_{t=1}^d w_t \langle \mathcal{A}^t(\Delta^d), \mathcal{A}^t(\Delta^d) \rangle. \end{aligned} \quad (20)$$

The result follows from combining (19) and (20). Note that the above proof holds if we replace  $\mathbb{C}(r, \cdot)$  with  $\mathbb{C}(r, a)$ , which completes our proof.  $\square$

## B Proof of Theorem 3.4

*Proof.* The proof consists of lower bounding the LHS of (4) and upper bounding the RHS of (4).

We use the following lemma to lower bound  $\sum_{t=1}^d w_t \|\mathcal{A}^t(\Delta^d)\|_2^2$ .

**Lemma B.1.** Suppose the linear operator  $\mathcal{A}^t : \mathbb{R}^{n_1 \times n_2} \rightarrow \mathbb{R}^{m_0}$  is random Gaussian ensemble for all  $1 \leq t \leq d$ . If  $m_0 > Dn_{\max}r \sum_{t=1}^d w_t^2$ , the composite operator  $\{\sqrt{w_t}\mathcal{A}^t\}_{t=1}^d$  satisfies the rank- $2r$  matrix RIP with constant  $\delta_{2r} \leq \delta$  with probability exceeding  $1 - C \exp(-cm_0)$ , where  $D, C$  and  $c$  (which depends on  $\sigma$ ) are absolute positive constants.

*Proof.* See Appendix C. □

Next lemma gives us an upper bound for the stochastic error  $\left\| \sum_{t=1}^d w_t \mathcal{A}^{t*} (h^t - z^t) \right\|_2$ .

**Lemma B.2.** Under the assumptions of Theorem 3.4, when  $m_0 \geq Dn_{\max}$ , we have

$$\left\| \sum_{t=1}^d w_t \mathcal{A}^{t*} (h^t - z^t) \right\|_2 \leq C_1 \sqrt{n_{\max}(1 + \delta_1) \left( \sum_{t=1}^d w_t^2 \sigma_1^2 + \sum_{t=1}^{d-1} (d-t) w_t^2 \frac{2rn_2}{m_0} \sigma_2^2 \right)}$$

with probability exceeding  $1 - dC \exp(-cn_2)$ , where  $D, C_1, C, c$  are positive constants and  $\delta_1$  is the rank-1 matrix RIP parameter for all  $\mathcal{A}^t$ 's.

*Proof.* See Appendix D. □

Theorem 3.4 follows by combining Lemma B.1, Lemma B.2 and Definition 3.3. □

## C Proof of Lemma B.1

*Proof.* First we introduce the following theorem providing a double-sided tail bound on the sum of independent sub-exponential random variables.

**Theorem C.1.** For independent  $X_i$  sub-exponential with parameters  $(\sigma_i, b_i)$ , with mean  $\mu_i$ ,

$$\mathbb{P} \left( \left| \sum_{i=1}^n (X_i - \mu_i) \right| \geq nt \right) \leq 2 \exp \left( -\frac{nt^2}{2(\sigma^2 + bt)} \right),$$

where  $\sigma^2 = \sum_i \sigma_i^2$  and  $b = \max_i b_i$ .

We now lower bound  $\sum_{t=1}^d w_t \|\mathcal{A}^t(\Delta^d)\|_2^2$ . Since all  $\mathcal{A}^t$ 's are Gaussian random measurement ensembles, then a particular measurement  $\langle A_i^t, \Delta^d \rangle^2$  is distributed as  $m_0^{-1} \|\Delta^d\|_F^2 \chi^2(1)$ . Therefore  $\sum_{t=1}^d w_t \|\mathcal{A}^t(\Delta^d)\|_2^2 = \sum_{t,i} w_t \langle A_i^t, \Delta^d \rangle^2$  is a weighted sum of i.i.d.  $\chi^2(1)$  random variables. Since  $\chi^2(1)$  is sub-exponential with parameters  $(4, 4)$ , Theorem C.1 implies a double-sided tail bound for  $\sum_{t=1}^d w_t \|\mathcal{A}^t(\Delta^d)\|_2^2$  for any given  $\Delta^d \in \mathbb{R}^{n_1 \times n_2}$  and any fixed  $0 < s < 1$

$$\mathbb{P} \left( \left| \sum_{t=1}^d w_t \|\mathcal{A}^t(\Delta^d)\|_2^2 - \|\Delta^d\|_F^2 \right| \leq s \|\Delta^d\|_F^2 \right) \leq 2 \exp \left( -\frac{m_0 s^2}{8 \sum_{t=1}^d w_t^2 + 8w_{\max} s} \right),$$

where  $w_{\max} = \max\{w_1, \dots, w_d\}$ . The probability can be further simplified if  $s$  is very small ( $\leq 1/d$ ).

Rank of  $\Delta^d$  is at most  $2r$  since  $\hat{X}^d, X^d$  are rank- $r$  matrices. By Theorem 2.3 in [4] (one may see the proof if necessary) if  $m_0 > Dn_{\max}r \sum_{t=1}^d w_t^2$ , the composite operator  $\{\sqrt{w_t}\mathcal{A}^t\}_{t=1}^d$  satisfies the rank- $2r$  matrix RIP with constant  $\delta_{2r} \leq \delta$  with probability exceeding  $1 - C \exp(-cm_0)$ , where  $C$  and  $c$  (depends on  $\delta$ ) are absolute positive constants. □

## D Proof of Lemma B.2

*Proof.* Let  $W = \sum_{t=1}^d w_t \mathcal{A}^{t*} (h^t - z^t)$  and  $n = n_{\max}$  for short. Following the basic framework of the proof of Lemma 1.1 in [4], we use  $\epsilon$ -nets method to bound the stochastic error  $\|W\|_2$ . The operator norm of  $W$  is

$$\|W\|_2 = \sup_{\|u\|=\|v\|=1} \langle u, Wv \rangle,$$

Consider a  $1/4$ -net  $\mathcal{N}_{1/4}$  of the unite sphere  $S^{n-1}$  with  $|\mathcal{N}_{1/4}| \leq 12^n$  (see (III.1) in [4]). For any  $v, u \in S^{n-1}$

$$\begin{aligned} \langle u, Wv \rangle &= \langle u - u_0, Wv \rangle + \langle u_0, W(v - v_0) \rangle + \langle u_0, Wv_0 \rangle \\ &\leq \|W\|_2 \|u - u_0\|_2 + \|W\|_2 \|v - v_0\|_2 + \langle u_0, Wv_0 \rangle, \end{aligned}$$

for some  $v_0, u_0 \in \mathcal{N}_{1/4}$  obeying  $\|u - u_0\|_2 \leq 1/4$  and  $\|v - v_0\|_2 \leq 1/4$ . So the operator norm of  $W$  is

$$\|W\|_2 \leq 2 \sup_{u_0, v_0 \in \mathcal{N}_{1/4}} \langle u_0, Wv_0 \rangle.$$

For fixed  $u_0, v_0$

$$\langle u_0, Wv_0 \rangle = \text{Tr}(u_0^T W v_0) = \text{Tr}(v_0 u_0^T W) = \langle u_0 v_0^T, W \rangle = \sum_{t=1}^d w_t \langle \mathcal{A}^t(u_0 v_0^T), h^t - z^t \rangle.$$

Let  $Z = \sum_{t=1}^d w_t \langle \mathcal{A}^t(u_0 v_0^T), z^t \rangle$  and  $H = \sum_{t=1}^d w_t \langle \mathcal{A}^t(u_0 v_0^T), h^t \rangle$ . Since for all  $1 \leq t \leq d$ , entries of  $z^t$  are i.i.d.  $\mathcal{N}(0, \sigma_1^2)$ , therefore  $Z \sim \mathcal{N}(0, \sigma_Z^2)$ , where the variance  $\sigma_Z^2$  is

$$\sigma_Z^2 = \sum_{t=1}^d w_t^2 \|\mathcal{A}^t(u_0 v_0^T)\|_2^2 \sigma_1^2 \leq \sum_{t=1}^d w_t^2 (1 + \delta_1) \|u_0 v_0^T\|_F^2 \sigma_1^2 = \sum_{t=1}^d w_t^2 (1 + \delta_1) \sigma_1^2. \quad (21)$$

The first inequality uses the matrix RIP for rank-1 matrices. For a fixed  $t$ ,  $\mathcal{A}^t$  satisfies the rank-1 matrix RIP with constant  $\delta_1$ , with probability at least  $1 - C_2 \exp(-c_2 m_0)$  provided that  $m_0 \geq D_2 n$  by Theorem 2.3 in [4], where  $C_2, c_2$  and  $D_2$  are fixed positive constants. Then by a union bound, for all  $1 \leq t \leq d$ ,  $\mathcal{A}^t$  satisfies the rank-1 matrix RIP property with parameter  $\sigma_1$ , with probability at least  $1 - dC_2 \exp(-c_2 m_0)$  provided that  $m_0 \geq D_2 n$ .

We now simplify  $H$  as

$$\begin{aligned} H &= \sum_{t=1}^d w_t \langle \mathcal{A}^t(u_0 v_0^T), h^t \rangle = \sum_{t=1}^{d-1} w_t \left\langle \mathcal{A}^t(u_0 v_0^T), \sum_{s=t+1}^d \mathcal{A}^s[U(\epsilon^s)^T] \right\rangle \\ &= \sum_{s=2}^d \sum_{t=1}^{s-1} \left\langle w_t \mathcal{A}^t(u_0 v_0^T), \mathcal{A}^s[U(\epsilon^s)^T] \right\rangle \\ &= \sum_{s=2}^d \sum_{t=1}^{s-1} \left\langle w_t \mathcal{A}^{t*} \mathcal{A}^t(u_0 v_0^T), U(\epsilon^s)^T \right\rangle \\ &= \sum_{s=2}^d \sum_{t=1}^{s-1} \sum_{i=1}^{m_0} \left\langle w_t [\mathcal{A}^t(u_0 v_0^T)]_i A_i^t, U(\epsilon^s)^T \right\rangle \\ &= \sum_{s=2}^d \left\langle \sum_{t=1}^{s-1} w_t \|\mathcal{A}^t(u_0 v_0^T)\|_2 U^T A^t, (\epsilon^s)^T \right\rangle, \end{aligned}$$

where  $A^t \in \mathbb{R}^{n_1 \times n_2}$  contains i.i.d.  $\mathcal{N}(0, 1/m_0)$  entries. The last equality uses the property that sum of independent Gaussian variables is also Gaussian, and the variance is the sum of individual variances. Since for all  $2 \leq s \leq d$ , entries of  $\epsilon^s$  are i.i.d.  $\mathcal{N}(0, \sigma_2^2)$ , therefore  $H \sim \mathcal{N}(0, \sigma_H^2)$ ,

where the variance  $\sigma_H^2$  is

$$\begin{aligned}
\sigma_H^2 &= \sum_{s=2}^d \left\| \sum_{t=1}^{s-1} w_t \left\| \mathcal{A}^t (u_0 v_0^T) \right\|_2 U^T A^t \right\|_F^2 \stackrel{(\xi_1)}{\leq} \sum_{s=2}^d \left\| \sum_{t=1}^{s-1} w_t \sqrt{1 + \delta_1} U^T A^t \right\|_F^2 \sigma_2^2 \\
&\stackrel{(\xi_2)}{=} \sum_{s=2}^d \sum_{t=1}^{s-1} w_t^2 (1 + \delta_1) \left\| U^T B^s \right\|_F^2 \sigma_2^2 \\
&= \sum_{s=2}^d \sum_{t=1}^{s-1} w_t^2 (1 + \delta_1) \frac{1}{m_0} \chi_s^2(r n_2) \sigma_2^2 \quad (22) \\
&\stackrel{(\xi_3)}{\leq} \sum_{s=2}^d \sum_{t=1}^{s-1} w_t^2 (1 + \delta_1) \frac{1}{m_0} 3m_0 \sigma_2^2 \\
&= \sum_{t=1}^{d-1} (d-t) w_t^2 (1 + \delta_1) \sigma_2^2.
\end{aligned}$$

Inequality  $(\xi_1)$  holds with probability exceeding  $1 - dC_2 \exp(-c_2 m_0)$  provided that  $m_0 \geq Dn$  based on the matrix RIP for rank-1 matrices as used while bounding  $\sigma_Z^2$ . Equality  $(\xi_2)$  uses the property that sum of independent Gaussian variables is also Gaussian and entries of  $B^s$  are i.i.d.  $\mathcal{N}(0, 1/m_0)$ . Inequality  $(\xi_3)$  holds with probability at least  $1 - dC_3 \exp(-c_3 m_0)$  by the concentration property of correlated Chi-squared variables.

Since the measurement noise  $Z$  and dynamic perturbation  $H$  are independent, then  $\langle u_0, W v_0 \rangle \sim \mathcal{N}(0, \sigma_Z^2 + \sigma_H^2)$ . Then by a standard tail bound for Gaussian random variables we have

$$\mathbb{P}(|\langle u_0, W v_0 \rangle| > \lambda) \leq 2 \exp\left(-\frac{\lambda^2}{2(\sigma_H^2 + \sigma_Z^2)}\right).$$

Therefore by an standard union bound we bound the stochastic error

$$\mathbb{P}\left(\|W\|_2 \geq C_0 \sqrt{n(\sigma_H^2 + \sigma_Z^2)}\right) \leq 2 |\mathcal{N}_{1/4}|^2 \exp\left(-\frac{C_0^2 n}{8}\right) \leq 2 \exp(-cn), \quad (23)$$

where  $c = \frac{C_0^2}{8} - 2 \log 12$ . To ensure  $c > 0$ , we require  $C_0 > 4\sqrt{\log 12}$ .

Combining (21), (22), and (23), if  $m_0 \geq Dn$  we have

$$\|W\|_2 \leq C_0 \sqrt{n \left( (1 + \delta_1) \sum_{t=1}^d w_t^2 \left( \sigma_1^2 + (d-t) \frac{5r n_2}{m_0} \sigma_2^2 \right) \right)}$$

with probability exceeding  $1 - [dC_2 \exp(-c_2 m_0) + dC_3 \exp(-c_3 m_0) + 2 \exp(-cn)] \geq 1 - dC \exp(-cn_2)$ .  $\square$

## E Proof of Theorem 3.8

*Proof.* The proof follows the same framework of the proof of Theorem 7 in [15].

Before we lower bound  $\sum_{t=1}^d w_t \left\| \mathcal{A}^t (\Delta^d) \right\|_2^2$ , we consider the following constraint set for a given  $0 < r \leq n$ :

$$\mathcal{E}(r) = \left\{ X \in \mathbb{C}(r) : \|X\|_\infty = 1, \|X\|_F^2 \geq n_1 n_2 \sqrt{\frac{2048 \sum_{t=1}^d w_t^2 \log(n_1 + n_2)}{\log(6/5) m_0}} \right\}.$$

Define the following random matrix

$$\Sigma_R = \sum_{t=1}^d \sum_{i=1}^{m_0} w_t \gamma_i^t A_i^t,$$

where  $\gamma_i^t$  is Rademacher variable.

The following lemma bounds the restricted strong convexity (see [20]) of the operator  $\{\sqrt{w_t} \mathcal{A}^t\}_{t=1}^d$ .

**Lemma E.1.** Suppose all  $\mathcal{A}^t$ 's are fixed uniform sampling ensembles. For all  $X \in \mathcal{E}(r)$

$$\sum_{t=1}^d w_t \|\mathcal{A}^t(X)\|_2^2 \geq \frac{p}{2} \|X\|_F^2 - \frac{44rn_1n_2}{m_0} (\mathbb{E}(\|\Sigma_R\|))^2 \quad (24)$$

with probability at least  $1 - \frac{2}{(n_1+n_2)}$ .

*Proof.* See Appendix F. □

Note that  $\|\Delta^d\|_\infty \leq \|\hat{X}^d\|_\infty + \|X^d\|_\infty \leq 2\|X^d\|_\infty$ . To proceed, we consider the following two cases.

*Case I.*  $\frac{\Delta^d}{2\|X^d\|_\infty} \notin \mathcal{E}(2r)$ .

Following the definition of  $\mathcal{E}(2r)$  we have

$$\|\Delta^d\|_F^2 \leq c_2 \|X^d\|_\infty^2 n_1 n_2 \sqrt{\frac{\sum_{t=1}^d w_t^2 \log(n_1 + n_2)}{m_0}},$$

where  $C_2 = 4\sqrt{\frac{2048}{\log(6/5)}}$ . This yields the first part of inequality (11) in Theorem 3.8.

*Case II.*  $\frac{\Delta^d}{2\|X^d\|_\infty} \in \mathcal{E}(2r)$ .

Since  $\frac{\Delta^d}{2\|X^d\|_\infty} \in \mathcal{E}(2r)$ , applying Lemma E.1 yields

$$\sum_{t=1}^d w_t \|\mathcal{A}^t(\Delta^d)\|_2^2 \geq \frac{p}{2} \|\Delta^d\|_F^2 - \frac{362rn_1n_2}{m_0} (\mathbb{E}(\|\Sigma_R\|))^2 \|X^d\|_\infty^2. \quad (25)$$

Combining (25) and (4) yields

$$\begin{aligned} \frac{p}{2} \|\Delta^d\|_F^2 &\leq 2\sqrt{2r} \left\| \sum_{t=1}^d w_t \mathcal{A}^{t*}(h^t - z^t) \right\|_2 \|\Delta^d\|_F + \frac{362rn_1n_2}{m_0} (\mathbb{E}(\|\Sigma_R\|))^2 \|X^d\|_\infty^2 \\ &\leq \frac{8r}{p} \left\| \sum_{t=1}^d w_t \mathcal{A}^{t*}(h^t - z^t) \right\|_2^2 + \frac{p}{4} \|\Delta^d\|_F^2 + \frac{362rn_1n_2}{m_0} (\mathbb{E}(\|\Sigma_R\|))^2 \|X^d\|_\infty^2. \end{aligned}$$

The above inequality can be further simplified as

$$\|\Delta^d\|_F^2 \leq \frac{32rn_1^2n_2^2}{m_0^2} \left\| \sum_{t=1}^d w_t \mathcal{A}^{t*}(h^t - z^t) \right\|_2^2 + \frac{1448rn_1^2n_2^2}{m_0^2} (\mathbb{E}(\|\Sigma_R\|))^2 \|X^d\|_\infty^2. \quad (26)$$

Next we bound  $\mathbb{E}(\|\Sigma_R\|)$  in the following lemma.

**Lemma E.2.** Suppose all  $\mathcal{A}^t$ 's are fixed uniform sampling ensembles. For  $m_0 \geq Dn_{\min} \log(n_1 + n_2) \phi(w)$ , where  $\phi(w) = \frac{w_{\max}^2}{\sum_{t=1}^d w_t^2}$ , there exists an absolute positive constant  $C$  such that

$$\mathbb{E}(\|\Sigma_R\|) \leq C \sqrt{\frac{2e \log(n_1 + n_2) \sum_{t=1}^d w_t^2 m_0}{n_{\min}}}. \quad (27)$$

The proof is not provided since it is almost the same as that of Lemma 6 in [15] with some minor modifications. Note that our results are a bit stronger compared to Lemma 6 in [15], since we are dealing with bounded variables.

Now we upper bound the stochastic error  $\|J\|_2^2 := \left\| \sum_{t=1}^d w_t \mathcal{A}^{t*}(h^t - z^t) \right\|_2^2$ . First, we rewrite  $J$  as

$$J = \sum_{t=1}^d w_t \mathcal{A}^{t*} \mathcal{A}^t \left[ U \left( \sum_{s=t+1}^d \epsilon^s \right)^T + Z^t \right],$$

where each entry of the random matrix  $Z^t \in \mathbb{R}^{n_1 \times n_2}$  is i.i.d. Gaussian distributed with variance  $\sigma_1^2$ . Set  $Y^t = U \left( \sum_{s=t+1}^d \epsilon^s \right)^T$  and  $F^t = Y^t + Z^t$ . Note that  $F^t$  may be correlated for different  $1 \leq t \leq d$ , though for a given  $t$  the entries of  $F^t$  are independent.

We now introduce an  $n_1 \times n_2$  random matrix  $G^t$  that has exactly one non-zero entry:

$$G^t = w_t n_1 n_2 F_{ij}^t E_{ij}, \quad \text{with probability } \frac{1}{n_1 n_2},$$

where  $E_{ij}$  is the canonical basis of matrices with dimension  $n_1 \times n_2$ . We also introduce the following random matrix  $H^t$ , which is the average of  $m_0$  independent copies of  $G^t$ :

$$H^t = \frac{1}{m_0} \sum_{i=1}^{m_0} G_i^t \quad \text{where each } G_i^t \text{ is an independent copy of } G^t.$$

Then  $J$  can be decomposed as sum of independent random matrices:  $J = \frac{m_0}{n_1 n_2} \sum_{t=1}^d H^t$ . It is immediate that

$$\mathbb{E} G^t = \mathbb{E} H^t = w_t F^t, \quad \mathbb{E} J = \frac{m_0}{n_1 n_2} \sum_{t=1}^d w_t F^t.$$

Before we proceed we introduce a lemma describing the spectral norm deviation of a sum of uncentered random matrices from its mean value.

**Lemma E.3.** (Corollary 6.1.2 in [24]) *Consider a finite sequence  $\{S_k\}$  of independent random matrices with common dimension  $n_1 \times n_2$ . Assume that each matrix has uniformly bounded deviation from its mean:*

$$\|S_k - \mathbb{E} S_k\| \leq L \quad \text{for each index } k.$$

Consider the sum

$$Z = \sum_k S_k.$$

Let  $\rho(Z)$  denotes the matrix variance statistic of the sum:

$$\begin{aligned} \rho(Z) &= \max \left\{ \left\| \mathbb{E}[(Z - \mathbb{E}Z)(Z - \mathbb{E}Z)^T] \right\|, \left\| \mathbb{E}[(Z - \mathbb{E}Z)^T(Z - \mathbb{E}Z)] \right\| \right\} \\ &= \max \left\{ \left\| \sum_k \mathbb{E}[(S_k - \mathbb{E}S_k)(S_k - \mathbb{E}S_k)^T] \right\|, \left\| \sum_k \mathbb{E}[(S_k - \mathbb{E}S_k)^T(S_k - \mathbb{E}S_k)] \right\| \right\}. \end{aligned}$$

Then for all  $s \geq 0$ ,

$$\mathbb{P}(\|Z - \mathbb{E}Z\| \geq s) \leq (n_1 + n_2) \exp \left( \frac{-s^2/2}{\rho(Z) + Ls/3} \right).$$

We are going to apply the above uncentered Bernstein inequality to the sum of  $dm_0$  independent random matrices  $\sum_{t=1}^d H^t = \frac{1}{m_0} \sum_{t=1}^d \sum_{k=1}^{m_0} G_k^t$ . Before doing so, we note that for given  $t$  and  $k$ ,

$$\|G_k^t - \mathbb{E} G_k^t\| \leq \|G_k^t\| + \|\mathbb{E} G_k^t\| \leq \|G_k^t\| + \mathbb{E} \|G_k^t\| \leq 2 \|G_k^t\|.$$

The first inequality uses the triangle inequality; the second is Jensen's inequality.

To control  $\rho(\sum_{t=1}^d H^t)$ , first note that

$$\begin{aligned} \mathbf{0} &\preceq \sum_t \sum_k \mathbb{E} [G_k^t - \mathbb{E} G_k^t] (G_k^t - \mathbb{E} G_k^t)^T = \sum_t \sum_k \mathbb{E} [(G_k^t (G_k^t)^T) - (\mathbb{E} G_k^t) (\mathbb{E} G_k^t)^T] \\ &\preceq \sum_t \sum_k \mathbb{E} [G_k^t (G_k^t)^T] \\ &= m_0 \sum_t \mathbb{E} [G^t (G^t)^T]. \end{aligned}$$

The third relation holds because  $(\mathbb{E}G_k^t)(\mathbb{E}G_k^t)^T$  is positive semidefinite; the last relation uses the fact that for a fixed  $t$ ,  $G_k^t$  are random matrices following identical distributions independently for all  $1 \leq k \leq m_0$ . Now we can control  $\rho(\sum_{t=1}^d H^t)$  in the following

$$\rho\left(\sum_{t=1}^d H^t\right) \leq \frac{1}{m_0} \max \left\{ \left\| \sum_t \mathbb{E}[(G^t(G^t)^T)] \right\|, \left\| \sum_t \mathbb{E}[(G^t)^T G^t] \right\| \right\}.$$

Set  $\rho_0 := \max \left\{ \left\| \sum_{t=1}^d \mathbb{E}(G^t(G^t)^T) \right\|, \left\| \sum_{t=1}^d \mathbb{E}((G^t)^T G^t) \right\| \right\}$ . Then the remaining work is to uniformly upper bound  $\|G_k^t\|$  for all  $1 \leq t \leq d$  and  $1 \leq k \leq m_0$  and upper bound  $\rho_0$ .

First we turn to the uniform bound on the spectral norm of the random matrix  $G_k^t$  for all  $1 \leq t \leq d$  and  $1 \leq k \leq m_0$ . We have for all  $1 \leq t \leq d$  and  $1 \leq k \leq m_0$

$$\|G_k^t\| \leq \max_{i,j,t} w_t \|n_1 n_2 F_{ij}^t E_{ij}\| = n_1 n_2 \max_{i,j,t} w_t |F_{ij}^t|.$$

Since  $\mu(U) \leq \mu_0$ , the variance of each entry of the random matrix  $F^t$  can be bounded as  $\text{Var}(F_{ij}^t) \leq \frac{\mu_0^2 r}{n_1} \sigma_2^2 (d-t) + \sigma_1^2$ . Let  $\sigma_{\max}^2 = \max_t w_t^2 \left( \frac{\mu_0^2 r}{n_1} \sigma_2^2 (d-t) + \sigma_1^2 \right)$ . Then by the tail probability of Gaussian random variables and the standard union bound (over  $i, j$ ), for all  $1 \leq t \leq d$  and  $1 \leq k \leq m_0$  we have

$$\mathbb{P}\left(\|G_k^t\| \leq n_1 n_2 \sqrt{2 \log(d(n_1 + n_2) n_1 n_2) \sigma_{\max}^2} =: L\right) \geq 1 - 2/(n_1 + n_2).$$

Second we turn to the computation of  $\mathbb{E}(G^t(G^t)^T)$ . We have

$$\mathbb{E}(G^t(G^t)^T) = w_t^2 n_1^2 n_2^2 \sum_{i=1}^{n_1} \sum_{j=1}^{n_2} (F_{ij}^t)^2 E_{ij} E_{ij}^T \frac{1}{n_1 n_2} = w_t^2 n_1 n_2 \sum_{i=1}^{n_1} \sum_{j=1}^{n_2} (F_{ij}^t)^2 E_{ii}.$$

Similarly  $\mathbb{E}((G^t)^T G^t) = w_t^2 n_1 n_2 \sum_{i=1}^{n_1} \sum_{j=1}^{n_2} (F_{ij}^t)^2 E_{jj}$ . Then

$$\rho = n_1 n_2 \max \left\{ \max_i \sum_{t=1}^d \sum_{j=1}^{n_2} w_t^2 (F_{ij}^t)^2, \max_j \sum_{t=1}^d \sum_{i=1}^{n_1} w_t^2 (F_{ij}^t)^2 \right\}.$$

Let  $a_i = \sum_{t=1}^d \sum_{j=1}^{n_2} w_t^2 (F_{ij}^t)^2$  and  $b_j = \sum_{t=1}^d \sum_{i=1}^{n_1} w_t^2 (F_{ij}^t)^2$ . We first bound  $\max_i a_i$ . Note that  $a_i = \sum_{t=1}^d w_t^2 \sum_{j=1}^{n_2} (Y_{ij}^t + Z_{ij}^t)^2 \leq 2 \sum_{t=1}^d w_t^2 \sum_{j=1}^{n_2} [(Y_{ij}^t)^2 + (Z_{ij}^t)^2]$ . Note that for  $1 \leq i \leq n_1$  and  $1 \leq t \leq d$ ,  $\sum_{j=1}^{n_2} (Z_{ij}^t)^2 \sim \sigma_1^2 \chi^2(n_2)$  and are independent. So by the tail bound of Chi-squared variable and the standard union bound (over  $i$  and  $t$ ) we have

$$\mathbb{P}\left(\max_i \sum_{t=1}^d w_t^2 \sum_{j=1}^{n_2} (Z_{ij}^t)^2 \leq 5n_2 \sum_{t=1}^d w_t^2 \sigma_1^2\right) \geq 1 - dn_1 \exp(-n_2). \quad (28)$$

Similarly we have

$$\mathbb{P}\left(\max_j \sum_{t=1}^d w_t^2 \sum_{i=1}^{n_1} (Z_{ij}^t)^2 \leq 5n_1 \sum_{t=1}^d w_t^2 \sigma_1^2\right) \geq 1 - dn_2 \exp(-n_1). \quad (29)$$

For  $\sum_{j=1}^{n_2} (Y_{ij}^t)^2$ , note that  $Y_{ij}^t$  is Gaussian distributed and the variance is not greater than  $\frac{\mu_0^2 r}{n_1} (d-t) \sigma_2^2$  for all  $i, j, t$ , since  $\mu(U) \leq \mu_0$ . For a fixed  $i$ , for all  $1 \leq j \leq n_2$ ,  $Y_{ij}^t$  are independent Gaussian random variables. So given  $i$  and  $t$ , applying the tail bound of Chi-squared random variables yields

$$\mathbb{P}\left(\sum_{j=1}^{n_2} (Y_{ij}^t)^2 \leq 5n_2 (d-t) \frac{\mu_0^2 r}{n_1} \sigma_2^2\right) \geq 1 - \exp(-n_2).$$

By the standard union bound (over  $i$  and  $t$ ) we have

$$\mathbb{P}\left(\max_i \sum_{t=1}^d w_t^2 \sum_{j=1}^{n_2} (Y_{ij}^t)^2 \leq 5n_2 \frac{\mu_0^2 r}{n_1} \sum_{t=1}^d (d-t) w_t^2 \sigma_2^2\right) \geq 1 - dn_1 \exp(-n_2). \quad (30)$$

Now we turn to  $\sum_{i=1}^{n_1} (Y_{ij}^t)^2$ , which follows a Chi-squared distribution  $(d-t)\sigma_2^2\chi^2(r)$ , since

$$\sum_{i=1}^{n_1} (Y_{ij}^t)^2 = (Y_{:j}^t)^T Y_{:j}^t = \bar{\epsilon}_{j:}^t U^T U (\bar{\epsilon}_{j:}^t)^T = \bar{\epsilon}_{j:}^t (\bar{\epsilon}_{j:}^t)^T$$

where  $\bar{\epsilon}^t = \sum_{s=t+1}^d \epsilon^s$ . The last equality uses the fact that  $U$  is orthonormal. Then by the tail bound of Chi-squared random variables and the standard union bound (over  $j$  and  $t$ ) we have

$$\mathbb{P} \left( \max_j \sum_{t=1}^d w_t^2 \sum_{i=1}^{n_1} (Y_{ij}^t)^2 \leq 5n_1 \sum_{t=1}^d (d-t) w_t^2 \sigma_2^2 \right) \geq 1 - dn_2 \exp(-n_1). \quad (31)$$

Combining (28) and (30) yields

$$\mathbb{P} \left( \max_i a_i \leq 10n_2 \sum_{t=1}^d w_t^2 \left( \sigma_1^2 + \frac{\mu_0^2 r}{n_1} (d-t) \sigma_2^2 \right) \right) \geq 1 - 2dn_1 \exp(-n_2). \quad (32)$$

Similarly combining (29) and (31) yields

$$\mathbb{P} \left( \max_j b_j \leq 10n_1 \sum_{t=1}^d w_t^2 (\sigma_1^2 + (d-t) \sigma_2^2) \right) \geq 1 - 2dn_2 \exp(-n_1). \quad (33)$$

Note that  $1 \leq \mu_0 \leq \sqrt{n_1}/\sqrt{r}$ , so  $\frac{\mu_0^2 r}{n_1} \leq 1$ . Now we are ready to bound  $\rho_0$  by combining (32) and (33):

$$\mathbb{P} \left( \rho_0 \leq 10n_{\max} n_1 n_2 \left( \sum_{t=1}^d w_t^2 \sigma_1^2 + \sum_{t=1}^d w_t^2 (d-t) \sigma_2^2 \right) =: \nu \right) \geq 1 - 4dn_{\max} \exp(-n_{\min}). \quad (34)$$

Now by Lemma E.3, we have

$$\mathbb{P} \left( \left\| \sum_{t=1}^d H^t - \sum_{t=1}^d w_t F^t \right\| \geq s \right) \leq (n_1 + n_2) \exp \left( \frac{-m_0 s^2 / 2}{\nu + 2Ls/3} \right).$$

If we let  $s = \sqrt{\frac{8 \log(n_1 + n_2) \nu}{m_0}}$  and substitute this into the above matrix Bernstein inequality we obtain

$$\mathbb{P} \left( \left\| \sum_{t=1}^d H^t - \sum_{t=1}^d w_t F^t \right\| \geq \sqrt{\frac{8 \log(n_1 + n_2) \nu}{m_0}} \right) \leq 1/(n_1 + n_2).$$

A hidden condition when the above inequality holds is that  $\nu$  dominates the denominator of the exponential term. The remaining work is to have sufficiently large  $m_0$  to guarantee that  $\nu$  dominates the denominator of the exponential, which follows

$$\nu \geq 2/3L \sqrt{\frac{8 \log(n_1 + n_2) \nu}{m_0}}.$$

The above inequality immediately implies that

$$m_0 \geq \frac{32}{45} n_{\min} \log(d(n_1 + n_2) n_1 n_2) \log(n_1 + n_2) \frac{\max_t w_t^2 \left( (d-t) \frac{\mu_0^2 r}{n_1} \sigma_2^2 + \sigma_1^2 \right)}{\sum_{t=1}^d w_t^2 ((d-t) \sigma_2^2 + \sigma_1^2)}.$$

Note that  $n_1 + n_2 > n_i, i = 1, 2$ , and  $n_1 + n_2 > d$ , then the above sample complexity can be simplified as

$$m_0 \geq \frac{128}{45} n_{\min} \log^2(n_1 + n_2) \frac{\max_t w_t^2 \left( (d-t) \frac{\mu_0^2 r}{n_1} \sigma_2^2 + \sigma_1^2 \right)}{\sum_{t=1}^d w_t^2 ((d-t) \sigma_2^2 + \sigma_1^2)}. \quad (35)$$



The remaining work is to bound  $\left\| \sum_{t=1}^d w_t F^t \right\|$ . First we note that each entry of  $F^t$  is Gaussian and the variance is not greater than  $\sigma_1^2 + (d-t)\sigma_2^2$ . Then, according to results on bounds for the spectral norm of i.i.d. Gaussian ensemble, we have

$$\mathbb{P} \left( \left\| \sum_{t=1}^d w_t F^t \right\| \leq 2 \sqrt{\sum_{t=1}^d w_t^2 (\sigma_1^2 + (d-t)\sigma_2^2) \sqrt{n_{\max}}} \right) \geq 1 - C_1 \exp(-c_2 n_{\max}), \quad (36)$$

where  $C_1, c_2$  are absolute positive constants. Note that  $C_1 \exp(-c_2 n_{\max}) \ll d n_{\max} \exp(-n_{\min})$ .

Now we are ready to bound  $\|J\|_2^2$ . With probability at least  $1 - \frac{3}{n_1+n_2} - 5d n_{\max} \exp(-n_{\min})$  we have

$$\begin{aligned} \|J\|_2^2 &\leq p^2 \left( \left\| \sum_{t=1}^d w_t F^t \right\| + \sqrt{\frac{8 \log(n_1 + n_2) \nu}{m_0}} \right)^2 \\ &\leq 320 p^2 \max\{n_1 n_2 \log(n_1 + n_2)/m_0, 1\} n_{\max} \sum_{t=1}^d w_t^2 ((d-t)\sigma_2^2 + \sigma_1^2) \\ &= 320 p^2 \sum_{t=1}^d w_t^2 ((d-t)\sigma_2^2 + \sigma_1^2) n_1 n_2 \log(n_1 + n_2) n_{\max}/m_0 \\ &= \frac{320 m_0 \log(n_1 + n_2) \sum_{t=1}^d w_t^2 ((d-t)\sigma_2^2 + \sigma_1^2)}{n_{\min}}. \end{aligned} \quad (37)$$

The first equality uses the fact that  $m_0 < n_1 n_2 \log(n_1 + n_2)$ .

Combining (26), (27) and (37) yields the second part of inequality (11) in Theorem 3.8.  $\square$

## F Proof of Lemma E.1

*Proof.* The proof is almost the same as the proof of Lemma 12 in [15] with some minor modifications.

Set  $\mathcal{F} = \frac{44 r n_1 n_2}{m_0} (\mathbb{E}(\|\Sigma_R\|))^2$ . We will show that the probability of the following bad event is small:

$$\mathcal{B} = \left\{ \exists X \in \mathcal{E}(r) \text{ such that } \left| \sum_{t=1}^d w_t \|\mathcal{A}^t(X)\|_2^2 - p \|X\|_F^2 \right| > \frac{p}{2} \|X\|_F^2 + \mathcal{F} \right\}.$$

Note that  $\mathcal{B}$  contains the complement of the event in Lemma E.1.

We use a peeling argument to bound the probability of  $\mathcal{B}$ . Let  $\nu = \sqrt{\frac{2048 \sum_{t=1}^d w_t^2 \log(n_1 + n_2)}{\log(6/5) m_0}}$  and  $\alpha = 6/5$ . For  $l \in \mathcal{N}$  let

$$S_l = \left\{ X \in \mathcal{E}(r) : \nu \alpha^{l-1} \leq \frac{1}{n_1 n_2} \|X\|_F^2 \leq \nu \alpha^l \right\}.$$

Then if event  $\mathcal{B}$  holds for some  $X \in \mathcal{E}(r)$ , it must be that  $X$  belongs to some  $S_l$  and

$$\left| \sum_{t=1}^d w_t \|\mathcal{A}^t(X)\|_2^2 - p \|X\|_F^2 \right| > \frac{p}{2} \|X\|_F^2 + \mathcal{F} > \frac{5}{12} \alpha^l \nu m_0 + \mathcal{F}. \quad (38)$$

For  $T > \nu$  consider the set

$$\mathcal{E}(r, T) = \left\{ X \in \mathcal{E}(r) : \|X\|_F^2 \leq n_1 n_2 T \right\}$$

and the event

$$\mathcal{B}_l = \left\{ \exists X \in \mathcal{E}(r, \alpha^l \nu) \text{ such that } \left| \sum_{t=1}^d w_t \|\mathcal{A}^t(X)\|_2^2 - p \|X\|_F^2 \right| > \frac{5}{12} \alpha^l \nu m_0 + \mathcal{F} \right\}. \quad (39)$$

Note that  $X \in S_l$  implies that  $X \in \mathcal{E}(r, \alpha^l \nu)$ . Then (38) implies that  $\mathcal{B}_l$  holds and  $\mathcal{B} \subset \cup \mathcal{B}_l$ . Thus, it is sufficient to bound the probability of the simpler event  $\mathcal{B}_l$  and then apply the union bound. Such a bound is given by the following lemma. Its proof is given in Appendix G. Let

$$H_T = \sup_{X \in \mathcal{E}(r, T)} \left| \sum_{t=1}^d w_t \|\mathcal{A}^t(X)\|_2^2 - p \|X\|_F^2 \right|.$$

**Lemma F.1.** *Suppose all  $\mathcal{A}^t$ 's are fixed uniform sampling ensembles. Then*

$$\mathbb{P} \left( H_T > \frac{5}{12} \alpha^l \nu m_0 + \mathcal{F} \right) \leq \exp \left( \frac{-c_5 m_0 T^2}{\sum_{t=1}^d w_t^2} \right),$$

where  $c_5 = 1/4096$ .

The above lemma implies that  $\mathbb{P}(\mathcal{B}_l) \leq \exp(-c_5 m_0 \alpha^{2l} \nu^2)$ . By a union bound, we have

$$\mathbb{P}(\mathcal{B}) \leq \sum_{l=1}^{\infty} \mathbb{P}(\mathcal{B}_l) \leq \sum_{l=1}^{\infty} \exp \left( \frac{-c_5 m_0 \alpha^{2l} \nu^2}{\sum_{t=1}^d w_t^2} \right) \leq \sum_{l=1}^{\infty} \exp \left( \frac{-(2c_5 m_0 \log(\alpha) \nu^2) l}{\sum_{t=1}^d w_t^2} \right),$$

where the last inequality uses the bound  $e^x \geq x$ . Then, substituting  $v = \sqrt{\frac{2048 \sum_{t=1}^d w_t^2 \log(n_1 + n_2)}{\log(6/5) m_0}}$  into the above summation we obtain

$$\mathbb{P}(\mathcal{B}) \leq 2/(n_1 + n_2).$$

This completes the proof.  $\square$

## G Proof of Lemma F.1

*Proof.* The proof is almost the same as the proof of Lemma 14 in [15] with some minor modifications.

By Massart's concentration inequality (see, e.g., [2], Theorem 14.2), we have

$$\mathbb{P} \left( H_T \geq \mathbb{E}(H_T) + \frac{1}{9} \frac{5}{12} m_0 T \right) \leq \exp \left( \frac{-c_5 m_0 T^2}{\sum_{t=1}^d w_t^2} \right), \quad (40)$$

where  $c_5 = 1/4096$ . Next we bound the expectation  $\mathbb{E}(H_T)$ . Using a symmetrization argument we obtain

$$\mathbb{E}(H_T) \leq 2\mathbb{E} \left( \sup_{X \in \mathcal{E}(r, T)} \left| \sum_{t=1}^d w_t \gamma_i^t \sum_{i=1}^{m_0} \langle A_i^t, X \rangle^2 \right| \right),$$

where  $\gamma_i^t$  is a Rademacher variable (independent on both  $i$  and  $t$ ). The assumption  $\|X\|_{\infty} = 1$  implies that  $|\langle A_i^t, X \rangle| \leq 1$ . Then the contraction inequality yields

$$\mathbb{E}(H_T) \leq 8\mathbb{E} \left( \sup_{X \in \mathcal{E}(r, T)} \left| \sum_{t=1}^d w_t \gamma_i^t \sum_{i=1}^{m_0} \langle A_i^t, X \rangle \right| \right) = 8\mathbb{E} \left( \sup_{X \in \mathcal{E}(r, T)} |\langle \Sigma_R, X \rangle| \right),$$

where  $\Sigma_R = \sum_{t=1}^d \sum_{i=1}^{m_0} w_t \gamma_i^t A_i^t$ . Since  $X \in \mathcal{E}(r, T)$ , we have

$$\|X\|_* \leq \sqrt{r} \|X\|_F \leq \sqrt{r n_1 n_2 T}.$$

Then by the trace duality inequality, we obtain

$$\mathbb{E}(H_T) \leq 8\sqrt{r n_1 n_2 T} \mathbb{E} \|\Sigma_R\|_2.$$

Finally using

$$\frac{1}{9} \frac{5}{12} m_0 T + 8\sqrt{r n_1 n_2 m_0 T} \frac{1}{\sqrt{m_0}} \mathbb{E} \|\Sigma_R\|_2 \leq \frac{1}{9} \frac{5}{12} m_0 T + \frac{8}{9} \frac{5}{12} m_0 T + \frac{44 r n_1 n_2}{m_0} (\mathbb{E} \|\Sigma_R\|_2)^2$$

combined with (40) we complete the proof.  $\square$
